# Supplementary material for: Reduction in the Cocoa Spontaneous and Starter Culture Fermentation Time Based on the Antioxidant Profile Characterization
Source: MDPI journal article supplement (doi:10.3390/foods12173291), 2023-09-01
Supplement: s1 [file s1]

Table S1: Average values of pH, dissolved oxygen and temperature (°C) in cocoa pulp-bean mass in SF and SC

| Sample   | Spontaneous Fermentation (SF) |       |             | Fermentation with starter culture (SC) |       |             |
|----------|-------------------------------|-------|-------------|----------------------------------------|-------|-------------|
|          | pH                            | OD    | Temperature | pH                                     | OD    | Temperature |
| Gua_0h   | 3.797                         | 5.600 | 28.47       | 3.803                                  | 0.767 | 28.63       |
| Gua_24h  | 3.943                         | 0.833 | 29.87       | 3.777                                  | 0.400 | 33.70       |
| Gua_48h  | 3.877                         | 2.067 | 32.53       | 3.847                                  | 1.800 | 34.10       |
| Gua_72h  | 4.217                         | 2.133 | 46.27       | 4.113                                  | 2.100 | 45.80       |
| Gua_96h  | 4.130                         | 1.500 | 46.10       | 3.967                                  | 1.733 | 45.97       |
| Gua_120h | 4.260                         | 2.033 | 42.43       | 3.887                                  | 1.600 | 44.20       |
| Gua_144h | 4.220                         | 0.567 | 42.33       | 3.910                                  | 1.133 | 43.90       |
| Gua_168h | 4.467                         | 1.367 | 48.63       | 4.740                                  | 1.700 | 48.23       |
| Tol_0h   | 4.020                         | 0.367 | 27.40       | 4.050                                  | 0.633 | 27.57       |
| Tol_24h  | 3.907                         | 0.267 | 28.27       | 3.637                                  | 1.067 | 29.33       |
| Tol_48h  | 3.727                         | 0.367 | 34.93       | 3.803                                  | 0.300 | 43.40       |
| Tol_72h  | 4.250                         | 1.267 | 44.53       | 4.127                                  | 1.000 | 43.70       |
| Tol_96h  | 4.283                         | 1.067 | 45.43       | 4.153                                  | 0.633 | 42.17       |
| Tol_120h | 4.240                         | 0.267 | 41.23       | 4.073                                  | 0.200 | 33.47       |
| Tol_144h | 4.260                         | 0.133 | 38.47       | 4.027                                  | 0.233 | 32.80       |
| Tol_168h | 4.453                         | 0.567 | 39.23       | 3.933                                  | 0.467 | 31.70       |
| Cop_0h   | 4.170                         | 2.733 | 25.70       | 4.147                                  | 2.933 | 25.40       |
| Cop_24h  | 3.643                         | 0.633 | 28.53       | 4.043                                  | 0.500 | 28.50       |
| Cop_48h  | 3.897                         | 1.900 | 33.30       | 3.863                                  | 1.800 | 34.13       |
| Cop_72h  | 4.467                         | 1.767 | 47.20       | 4.447                                  | 1.867 | 48.03       |
| Cop_96h  | 4.570                         | 1.867 | 45.60       | 4.310                                  | 1.900 | 45.47       |
| Cop_120h | 4.740                         | 1.367 | 47.57       | 4.733                                  | 1.233 | 47.97       |
| Cop_144h | 4.713                         | 0.833 | 44.60       | 4.807                                  | 0.767 | 44.37       |
| Cop_168h | 5.067                         | 0.533 | 47.30       | 5.010                                  | 0.400 | 47.67       |

Table S2: Average values of physicochemical parameters of cocoa beans during fermentation (SF and SC)

| Sample   | Spontaneous Fermentation (SC) |       |                  |       |       | Fermentation with starter culture (SC) |       |                  |       |       |
|----------|-------------------------------|-------|------------------|-------|-------|----------------------------------------|-------|------------------|-------|-------|
|          | pH                            | Aw    | Moisture content | TTA   | FI    | pH                                     | Aw    | Moisture content | TTA   | FI    |
| Gua_0h   | 6.637                         | 0.913 | 29.473           | 0.029 | 0.377 | 6.353                                  | 0.909 | 33.103           | 0.020 | 0.352 |
| Gua_24h  | 6.577                         | 0.916 | 38.960           | 0.026 | 0.506 | 6.553                                  | 0.906 | 34.167           | 0.039 | 0.857 |
| Gua_48h  | 6.037                         | 0.927 | 31.043           | 0.056 | 0.720 | 5.553                                  | 0.906 | 29.570           | 0.049 | 0.924 |
| Gua_72h  | 4.960                         | 0.928 | 30.140           | 0.140 | 1.080 | 5.117                                  | 0.910 | 35.830           | 0.078 | 1.442 |
| Gua_96h  | 4.613                         | 0.929 | 32.333           | 0.196 | 1.602 | 4.623                                  | 0.911 | 32.680           | 0.186 | 1.873 |
| Gua_120h | 4.390                         | 0.931 | 36.110           | 0.268 | 1.708 | 4.480                                  | 0.916 | 32.797           | 0.248 | 1.877 |
| Gua_144h | 4.550                         | 0.935 | 40.257           | 0.229 | 1.729 | 4.527                                  | 0.913 | 39.097           | 0.258 | 1.862 |
| Gua_168h | 4.483                         | 0.928 | 36.193           | 0.255 | 1.829 | 4.603                                  | 0.915 | 35.940           | 0.193 | 1.903 |
| Tol_0h   | 6.433                         | 0.963 | 32.930           | 0.075 | 0.361 | 6.437                                  | 0.923 | 27.913           | 0.049 | 0.336 |
| Tol_24h  | 6.150                         | 0.955 | 29.847           | 0.075 | 0.382 | 6.187                                  | 0.906 | 30.847           | 0.052 | 0.372 |
| Tol_48h  | 4.950                         | 0.947 | 29.860           | 0.160 | 0.591 | 5.013                                  | 0.895 | 30.493           | 0.154 | 0.581 |
| Tol_72h  | 4.690                         | 0.933 | 31.610           | 0.222 | 1.108 | 4.533                                  | 0.906 | 37.483           | 0.317 | 1.071 |
| Tol_96h  | 4.467                         | 0.945 | 32.317           | 0.242 | 1.498 | 4.333                                  | 0.921 | 36.643           | 0.376 | 1.412 |
| Tol_120h | 4.500                         | 0.946 | 23.830           | 0.278 | 1.652 | 4.433                                  | 0.931 | 30.220           | 0.287 | 1.486 |
| Tol_144h | 4.483                         | 0.954 | 30.357           | 0.268 | 1.698 | 4.373                                  | 0.943 | 32.067           | 0.271 | 1.588 |
| Tol_168h | 4.617                         | 0.949 | 23.390           | 0.216 | 1.697 | 4.340                                  | 0.935 | 31.163           | 0.297 | 1.455 |
| Cop_0h   | 6.780                         | 0.902 | 29.930           | 0.026 | 0.331 | 6.523                                  | 0.909 | 31.560           | 0.036 | 0.301 |
| Cop_24h  | 6.543                         | 0.899 | 32.363           | 0.026 | 0.340 | 6.597                                  | 0.888 | 28.060           | 0.023 | 0.333 |
| Cop_48h  | 5.997                         | 0.896 | 33.977           | 0.042 | 0.598 | 5.167                                  | 0.880 | 28.187           | 0.121 | 0.412 |
| Cop_72h  | 5.753                         | 0.894 | 33.677           | 0.052 | 0.661 | 4.947                                  | 0.884 | 26.700           | 0.144 | 0.780 |
| Cop_96h  | 4.820                         | 0.904 | 33.273           | 0.124 | 0.966 | 4.433                                  | 0.877 | 30.713           | 0.307 | 0.966 |
| Cop_120h | 4.930                         | 0.912 | 41.057           | 0.150 | 1.283 | 4.767                                  | 0.898 | 33.680           | 0.183 | 1.432 |
| Cop_144h | 4.787                         | 0.916 | 37.830           | 0.167 | 1.371 | 4.937                                  | 0.902 | 30.773           | 0.137 | 1.510 |
| Cop_168h | 4.920                         | 0.904 | 28.087           | 0.108 | 1.359 | 4.747                                  | 0.913 | 34.183           | 0.157 | 1.355 |

Additional Info : Peak(s) manually integrated

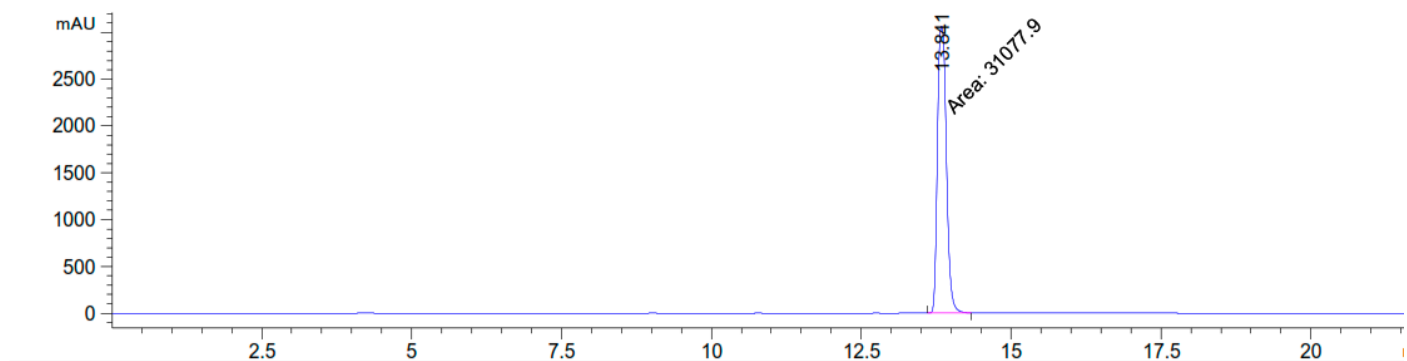

Figure S1. Chromatogram of caffeine standard at 300ppm

Chromatogram of standard obtained after the UHPLC analysis

Additional Info : Peak(s) manually integrated

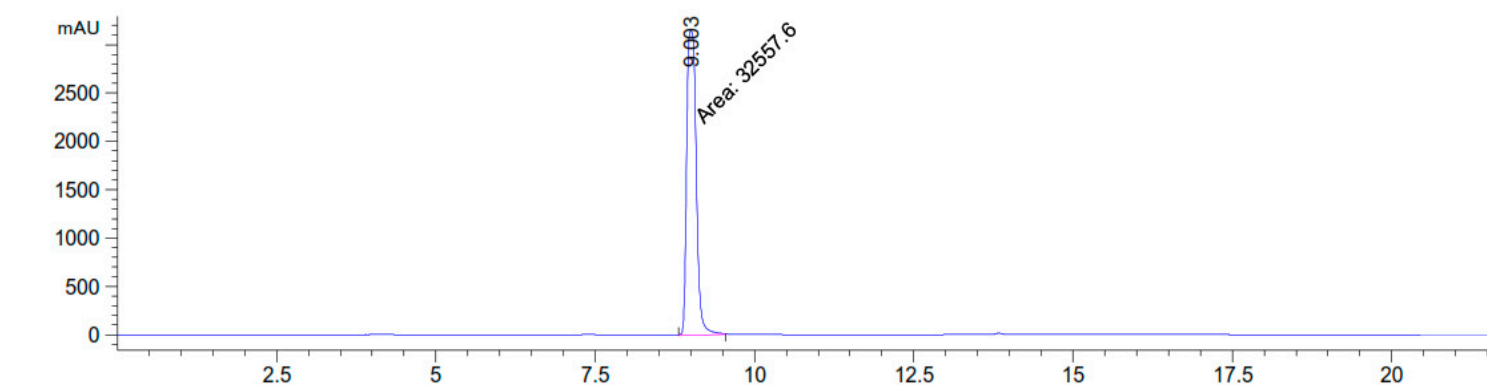

Figure S2. Chromatogram of theobromine standard at 300ppm

Chromatogram of standard obtained after the UHPLC analysis

Additional Info : Peak(s) manually integrated

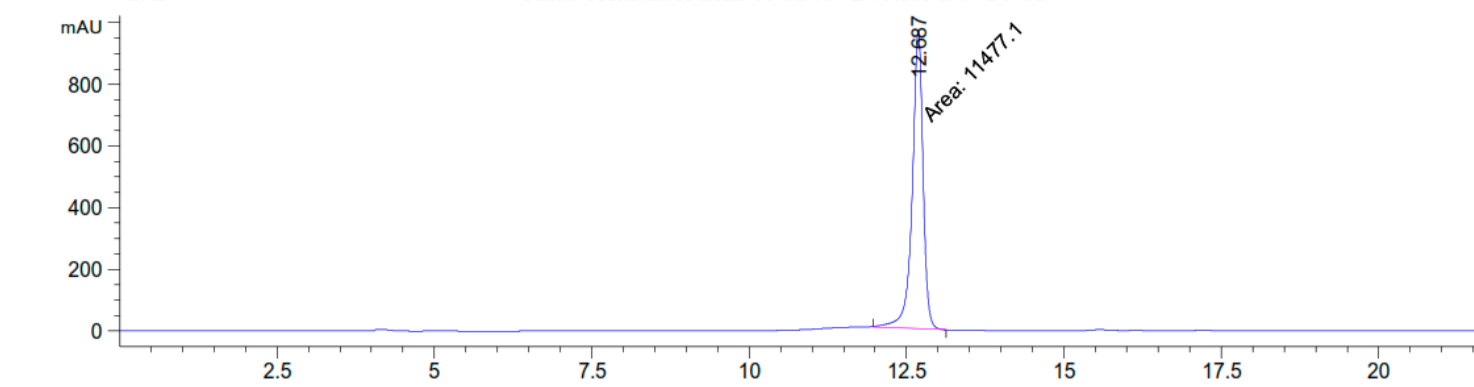

Figure S3. Chromatogram of catechin standard at 300ppm

Chromatogram of standard obtained after the UHPLC analysis

Additional Info : Peak(s) manually integrated

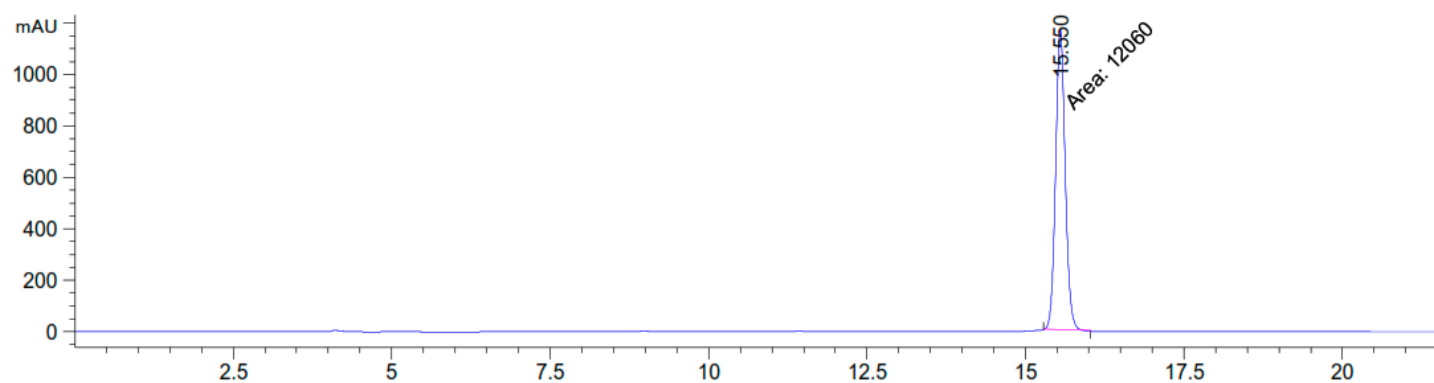

Figure S4. Chromatogram of epicatechin standard at 300ppm

Chromatogram of standard obtained after the UHPLC analysis

Table S3: Concentration of main volatile compounds (µg/g) by GC-MS in cocoa beans during spontaneous fermentation.

|                               |                                                          | COPALLIN |          |         |          |         |        |        |        | TOLOPAMPA |         |          |          |         |        |         |         | GUADALUPE |          |          |          |          |         |         |         |
|-------------------------------|----------------------------------------------------------|----------|----------|---------|----------|---------|--------|--------|--------|-----------|---------|----------|----------|---------|--------|---------|---------|-----------|----------|----------|----------|----------|---------|---------|---------|
|                               |                                                          | 0h       | 24h      | 48h     | 72h      | 96h     | 120h   | 144h   | 168h   | 0h        | 24h     | 48h      | 72h      | 96h     | 120h   | 144h    | 168h    | 0h        | 24h      | 48h      | 72h      | 96h      | 120h    | 144h    | 168h    |
| Aldehydes                     |                                                          |          |          |         |          |         |        |        |        |           |         |          |          |         |        |         |         |           |          |          |          |          |         |         |         |
| 2-methyl-Butanal              | Almond, Cocoa, Fermented, Hazelnut, Malt                 | 1.933    | 15.133   | 0.000   | 0.000    | 8.026   | 10.475 | 10.949 | 9.864  | 8.840     | 2.216   | 6.833    | 4.006    | 4.970   | 0.666  | 7.131   | 1.608   | 4.371     | 5.524    | 11.248   | 5.811    | 8.746    | 7.726   | 8.739   | 3.760   |
| 3-methyl-Butanal              | Malt, chocolate                                          | 16.241   | 29.556   | 9.870   | 0.000    | 35.344  | 39.685 | 40.797 | 53.151 | 10.893    | 3.869   | 23.904   | 19.652   | 20.266  | 5.086  | 31.746  | 5.500   | 8.098     | 0.000    | 22.214   | 22.469   | 33.615   | 29.857  | 32.139  | 11.766  |
| Hexanal                       | Apple, Fat, Fresh, Green, Oil                            | 6.629    | 9.817    | 0.000   | 0.000    | 0.000   | 0.000  | 0.000  | 0.000  | 0.000     | 3.225   | 0.000    | 0.000    | 0.000   | 0.000  | 0.000   | 0.000   | 15.499    | 3.819    | 0.000    | 0.000    | 0.000    | 0.000   | 0.000   | 0.000   |
| Nonanal                       | Fatty, Floral, Green, Lemon                              | 0.000    | 0.000    | 0.000   | 0.000    | 0.000   | 0.000  | 0.000  | 0.000  | 0.000     | 0.000   | 0.000    | 0.000    | 0.000   | 0.000  | 0.000   | 0.000   | 0.000     | 0.000    | 0.000    | 0.000    | 0.000    | 0.000   | 0.000   | 1.959   |
| Benzaldehyde                  | Bitter Almond, Burnt Sugar, Cherry, Malt, Roasted Pepper | 0.000    | 0.000    | 0.000   | 0.000    | 0.000   | 0.000  | 0.000  | 19.342 | 0.000     | 0.000   | 0.000    | 2.632    | 0.000   | 0.000  | 2.933   | 0.000   | 0.000     | 0.000    | 0.000    | 8.641    | 7.890    | 0.000   | 7.057   | 0.000   |
| Benzeneacetaldehyde           | Berry, Geranium, Honey, Walnut, Spicy                    | 16.520   | 35.024   | 87.550  | 53.291   | 119.904 | 73.100 | 98.505 | 78.281 | 19.394    | 25.441  | 145.572  | 82.140   | 90.764  | 13.823 | 88.953  | 25.453  | 9.669     | 49.768   | 98.661   | 99.291   | 120.490  | 123.960 | 70.371  | 62.413  |
| Ketones                       |                                                          |          |          |         |          |         |        |        |        |           |         |          |          |         |        |         |         |           |          |          |          |          |         |         |         |
| 2-Pentanone                   | fruit, spicy                                             | 44.577   | 63.374   | 40.093  | 7.192    | 0.000   | 13.589 | 17.316 | 13.558 | 86.953    | 17.987  | 37.929   | 22.516   | 11.643  | 4.890  | 20.624  | 23.574  | 33.546    | 28.085   | 32.154   | 14.486   | 9.351    | 10.699  | 2.302   | 9.065   |
| 2,3-Butanedione               | Butter, Pastry, Yeast                                    | 0.000    | 0.000    | 0.000   | 0.000    | 0.000   | 2.551  | 0.000  | 4.870  | 0.000     | 0.000   | 0.000    | 0.000    | 0.000   | 0.000  | 7.949   | 9.129   | 0.000     | 0.000    | 0.000    | 0.000    | 0.000    | 1.904   | 2.302   | 4.500   |
| 2-Heptanone                   | Blue Cheese, Fruit, Green, Nut, Spices                   | 20.946   | 54.680   | 25.783  | 24.988   | 48.657  | 49.769 | 51.197 | 54.234 | 40.997    | 34.431  | 74.687   | 49.688   | 43.232  | 24.433 | 76.845  | 93.454  | 176.059   | 186.112  | 63.336   | 92.704   | 91.172   | 80.525  | 107.608 | 64.129  |
| 3-methyl-2-Butanone           | flavoring agents                                         | 0.000    | 0.000    | 0.000   | 0.000    | 14.458  | 0.000  | 0.000  | 0.000  | 0.000     | 0.000   | 0.000    | 0.000    | 0.000   | 0.000  | 0.000   | 0.000   | 0.000     | 0.000    | 0.000    | 0.000    | 0.000    | 0.000   | 0.000   | 0.000   |
| Acetoin                       | Butter, Creamy, Green Pepper                             | 0.000    | 46.895   | 16.136  | 11.894   | 91.353  | 55.781 | 37.540 | 42.042 | 65.521    | 47.961  | 208.567  | 85.416   | 146.057 | 25.680 | 164.411 | 181.607 | 0.000     | 0.000    | 12.883   | 24.465   | 34.943   | 82.654  | 62.719  | 121.233 |
| 2-Nonanone                    | Fragrant, Fruit, Green, Hot Milk                         | 2.328    | 0.000    | 0.000   | 0.000    | 7.809   | 0.000  | 0.000  | 0.000  | 0.000     | 11.222  | 0.000    | 9.707    | 0.000   | 3.717  | 1.747   | 6.051   | 17.774    | 51.558   | 0.000    | 20.306   | 4.482    | 23.690  | 7.675   | 4.471   |
| Acetophenone                  | Almonds, Flower, Meat, Must                              | 10.669   | 0.000    | 16.716  | 0.000    | 0.000   | 9.485  | 6.111  | 0.000  | 29.224    | 8.024   | 14.030   | 7.960    | 6.601   | 0.000  | 5.528   | 9.323   | 10.316    | 27.525   | 30.745   | 15.320   | 12.455   | 9.616   | 8.127   | 8.523   |
| Alcohols                      |                                                          |          |          |         |          |         |        |        |        |           |         |          |          |         |        |         |         |           |          |          |          |          |         |         |         |
| 2-Butanol                     | Flavoring agents                                         | 0.000    | 0.000    | 0.000   | 0.000    | 0.000   | 0.000  | 0.000  | 0.000  | 0.000     | 0.000   | 0.000    | 0.000    | 0.000   | 0.000  | 0.000   | 0.000   | 1.592     | 0.000    | 0.000    | 0.000    | 0.000    | 0.000   | 0.000   | 0.000   |
| Ethanol                       | Alcoholic                                                | 29.862   | 1469.252 | 823.368 | 1273.493 | 763.391 | 3.864  | 0.000  | 0.000  | 371.320   | 749.370 | 2674.538 | 1633.579 | 537.433 | 3.358  | 0.000   | 0.000   | 17.118    | 1842.631 | 2231.980 | 1999.211 | 1950.038 | 6.115   | 4.986   | 0.000   |
| 2-methyl-3-Buten-2-ol         | flavoring agents                                         | 17.275   | 16.450   | 10.274  | 4.625    | 0.000   | 0.000  | 0.000  | 0.000  | 20.931    | 5.278   | 16.564   | 9.742    | 6.045   | 0.000  | 2.610   | 6.193   | 10.274    | 17.743   | 14.421   | 12.028   | 4.277    | 5.022   | 0.000   | 0.000   |
| 2-methyl-1-Propanol           | Apple, Bitter, Cocoa, Wine                               | 0.000    | 12.597   | 11.435  | 7.074    | 6.558   | 1.629  | 3.183  | 1.198  | 0.000     | 6.821   | 8.890    | 4.465    | 0.000   | 0.000  | 0.000   | 3.821   | 0.000     | 10.385   | 18.193   | 12.180   | 4.394    | 4.554   | 0.000   | 1.291   |
| 3-methyl-2-Butanol            | flavoring agents                                         | 1.972    | 0.000    | 0.000   | 0.000    | 0.000   | 0.000  | 0.000  | 0.000  | 0.000     | 0.000   | 0.000    | 0.000    | 0.000   | 9.826  | 0.000   | 0.000   | 0.000     | 0.000    | 0.000    | 0.000    | 0.000    | 0.000   | 0.000   | 0.000   |
| 1-Butanol, 3-methyl-, acetate | Apple, Banana, Glue, Pear                                | 0.000    | 0.000    | 23.339  | 21.587   | 123.729 | 45.095 | 80.990 | 21.806 | 0.000     | 2.840   | 31.739   | 55.327   | 123.488 | 25.449 | 72.429  | 73.524  | 0.000     | 0.000    | 0.000    | 79.849   | 44.965   | 102.785 | 15.152  | 38.059  |

|                                                   |                                                           |        |         |        |        |         |        |        |        |         |        |         |        |        |        |        |         |         |         |         |         |         |         |         |         |
|---------------------------------------------------|-----------------------------------------------------------|--------|---------|--------|--------|---------|--------|--------|--------|---------|--------|---------|--------|--------|--------|--------|---------|---------|---------|---------|---------|---------|---------|---------|---------|
| 2-Pentanol                                        | Fusel Oil, Green                                          | 90.829 | 152.710 | 89.759 | 55.957 | 61.116  | 26.667 | 36.742 | 14.231 | 131.358 | 64.526 | 118.642 | 66.272 | 50.663 | 0.000  | 22.699 | 61.107  | 149.421 | 238.480 | 192.461 | 128.617 | 86.635  | 59.594  | 26.072  | 29.504  |
| 3-methyl-1-Butanol                                | Burnt, Cocoa, Floral, Malt                                | 0.000  | 91.910  | 81.846 | 95.038 | 112.620 | 33.368 | 56.388 | 32.531 | 12.448  | 44.167 | 114.351 | 65.540 | 53.788 | 7.914  | 20.051 | 54.636  | 0.000   | 154.334 | 227.827 | 170.781 | 159.839 | 64.169  | 31.923  | 28.898  |
| 2-Hexanol                                         |                                                           | 1.898  | 3.900   | 0.000  | 0.000  | 0.000   | 0.000  | 0.000  | 0.000  | 4.202   | 2.297  | 0.000   | 1.576  | 0.000  | 0.000  | 0.000  | 0.000   | 4.085   | 5.233   | 4.753   | 3.547   | 3.498   | 0.000   | 0.000   | 0.000   |
| 2-Heptanol                                        | Citrus, Earth, Fried, Mushroom, Oil                       | 53.864 | 227.741 | 38.473 | 71.760 | 188.771 | 69.141 | 70.254 | 44.670 | 67.515  | 75.136 | 128.344 | 91.270 | 86.117 | 24.226 | 55.262 | 122.718 | 362.734 | 553.651 | 177.042 | 307.717 | 248.461 | 149.647 | 106.667 | 104.505 |
| 2-Octanol                                         | Fat, Fungus                                               | 0.000  | 0.000   | 0.000  | 0.000  | 0.000   | 0.000  | 0.000  | 0.000  | 0.000   | 0.000  | 0.000   | 0.000  | 0.000  | 0.000  | 0.000  | 0.000   | 0.000   | 3.766   | 0.000   | 0.000   | 0.000   | 0.000   | 0.000   | 0.000   |
| 2-Nonanol                                         | Cucumber                                                  | 0.000  | 8.539   | 0.000  | 0.000  | 11.147  | 0.000  | 0.000  | 0.000  | 0.000   | 3.917  | 0.000   | 3.836  | 0.000  | 1.948  | 0.000  | 4.899   | 11.932  | 60.848  | 6.152   | 19.118  | 2.901   | 16.139  | 7.946   | 3.974   |
| 2,3-Butanediol                                    | flavoring agents                                          | 0.000  | 5.913   | 5.315  | 14.625 | 113.669 | 39.460 | 36.630 | 31.454 | 0.000   | 0.000  | 315.180 | 36.675 | 42.307 | 0.000  | 51.447 | 94.686  | 0.000   | 17.205  | 8.764   | 19.842  | 208.075 | 115.759 | 48.157  | 73.633  |
| Benzyl alcohol                                    | Boiled Cherries, Moss, Toast, Rose                        | 0.000  | 0.000   | 0.000  | 0.000  | 0.000   | 0.000  | 0.000  | 0.000  | 0.000   | 0.000  | 0.000   | 0.000  | 0.000  | 0.000  | 0.000  | 0.000   | 47.186  | 0.000   | 0.000   | 0.000   | 0.000   | 0.000   | 0.000   | 0.000   |
| Phenylethyl Alcohol                               | Fruit, Honey, Lilac, Rose, Wine                           | 8.366  | 14.399  | 32.887 | 0.000  | 89.182  | 34.879 | 46.197 | 38.893 | 0.000   | 15.222 | 80.938  | 29.036 | 39.240 | 6.137  | 23.218 | 50.106  | 0.000   | 45.945  | 46.526  | 43.736  | 106.852 | 73.615  | 32.821  | 37.177  |
| 1-propanol                                        | Alcohol, Caramel, Pungent                                 | 0.000  | 5.159   | 5.662  | 0.000  | 0.000   | 0.000  | 0.000  | 0.000  | 0.000   | 0.000  | 0.000   | 0.000  | 0.000  | 0.000  | 0.000  | 0.000   | 0.000   | 0.000   | 0.000   | 0.000   | 0.000   | 0.000   | 0.000   | 0.000   |
| Esters                                            |                                                           |        |         |        |        |         |        |        |        |         |        |         |        |        |        |        |         |         |         |         |         |         |         |         |         |
| Isobutyl acetate                                  | Apple, Banana, Floral, Grass                              | 0.000  | 0.000   | 1.969  | 0.000  | 10.824  | 1.439  | 3.948  | 0.000  | 0.000   | 0.000  | 3.694   | 6.410  | 9.553  | 2.118  | 3.363  | 4.555   | 0.000   | 0.000   | 0.000   | 5.142   | 2.542   | 5.370   | 0.000   | 1.091   |
| Acetic acid, butyl ester                          | Apple, Banana, Glue, Pungent                              | 0.000  | 0.000   | 0.000  | 0.000  | 4.200   | 0.000  | 0.000  | 1.936  | 0.000   | 0.000  | 4.452   | 0.000  | 0.000  | 0.000  | 0.000  | 0.000   | 0.000   | 0.000   | 0.000   | 1.233   | 3.256   | 0.000   | 1.572   | 1.698   |
| 2-Pentanol, acetate                               | Fruit                                                     | 0.000  | 0.000   | 6.518  | 11.545 | 17.130  | 17.090 | 23.294 | 4.531  | 0.000   | 1.887  | 12.095  | 16.362 | 33.035 | 8.347  | 22.367 | 40.800  | 0.000   | 0.000   | 0.000   | 14.968  | 16.051  | 28.663  | 5.393   | 10.333  |
| Hexanoic acid, ethyl ester                        | Apple peel, brandy, bubble gum, overripe fruit, pineapple | 0.000  | 0.000   | 0.000  | 0.000  | 9.245   | 0.000  | 0.000  | 0.000  | 0.000   | 0.000  | 0.000   | 2.715  | 5.251  | 0.000  | 0.000  | 0.000   | 0.000   | 0.000   | 0.000   | 14.905  | 4.978   | 4.330   | 0.000   | 1.913   |
| Propanoic acid, 2-methyl-, ethyl ester            | flavoring agents                                          | 0.000  | 0.000   | 1.822  | 0.000  | 0.000   | 0.000  | 0.000  | 0.000  | 0.000   | 0.000  | 0.000   | 0.000  | 0.000  | 0.000  | 0.000  | 0.000   | 0.000   | 0.000   | 0.000   | 0.000   | 0.000   | 0.000   | 0.000   | 0.000   |
| Propanoic acid, 2-hydroxy-, ethyl ester           | cheese, floral, fruity, spicy, rubber                     | 0.000  | 0.000   | 0.000  | 10.450 | 0.000   | 0.000  | 0.000  | 0.000  | 0.000   | 0.000  | 0.000   | 4.436  | 0.000  | 0.000  | 0.000  | 0.000   | 0.000   | 0.000   | 14.171  | 0.000   | 24.013  | 0.000   | 0.000   | 0.000   |
| Acetoin acetate                                   | Fruit                                                     | 0.000  | 0.000   | 0.000  | 0.000  | 0.000   | 0.000  | 0.000  | 0.000  | 0.000   | 0.000  | 0.000   | 0.000  | 4.765  | 1.608  | 3.314  | 10.107  | 0.000   | 0.000   | 0.000   | 0.000   | 0.000   | 0.000   | 0.000   | 4.258   |
| Octanoic acid, ethyl ester                        | Apricot, Brandy, Fat, Floral, Pineapple                   | 0.000  | 0.000   | 0.000  | 0.000  | 0.000   | 0.000  | 0.000  | 0.000  | 0.000   | 0.000  | 0.000   | 0.000  | 0.000  | 0.000  | 0.000  | 0.000   | 0.000   | 0.000   | 3.953   | 0.000   | 7.793   | 0.000   | 0.000   | 0.000   |
| Acetic acid, 2-phenylethyl ester                  | flower, honey, rose                                       | 0.000  | 0.000   | 0.000  | 0.000  | 0.000   | 0.000  | 5.465  | 0.000  | 0.000   | 0.000  | 0.000   | 4.779  | 13.145 | 2.748  | 6.880  | 4.636   | 0.000   | 0.000   | 0.000   | 0.000   | 0.000   | 12.562  | 0.000   | 8.516   |
| Hexadecanoic acid, ethyl ester                    | Wax                                                       | 0.000  | 0.000   | 0.000  | 0.000  | 0.000   | 0.000  | 0.000  | 0.000  | 0.000   | 0.000  | 0.000   | 0.000  | 0.000  | 0.000  | 0.000  | 0.000   | 0.000   | 0.000   | 0.000   | 1.459   | 1.653   | 0.000   | 0.000   | 0.551   |
| 2-Heptanol, acetate                               | Flavoring agents                                          | 0.000  | 0.000   | 0.000  | 5.668  | 0.000   | 3.418  | 0.000  | 0.000  | 0.000   | 2.262  | 0.000   | 0.000  | 0.000  | 0.000  | 0.000  | 0.000   | 0.000   | 0.000   | 0.000   | 0.000   | 0.000   | 0.000   | 0.000   | 0.000   |
| Pentanoic acid, 2-hydroxy-4-methyl-, methyl ester | Fruit                                                     | 0.000  | 0.000   | 0.000  | 0.000  | 0.000   | 0.000  | 0.000  | 0.000  | 0.000   | 0.000  | 0.000   | 0.000  | 0.000  | 0.000  | 2.089  | 0.000   | 0.000   | 0.000   | 0.000   | 0.000   | 0.000   | 0.000   | 0.000   | 0.000   |
| Benzeneacetic acid, ethyl ester                   | Floral, Fruit, Honey, Rose                                | 0.000  | 0.000   | 0.000  | 0.000  | 0.000   | 2.711  | 0.000  | 0.000  | 0.000   | 0.000  | 0.000   | 0.000  | 5.181  | 0.000  | 0.000  | 0.000   | 0.000   | 0.000   | 0.000   | 0.000   | 0.000   | 0.000   | 0.000   | 0.000   |

|                               |                                           |         |        |        |         |          |         |         |         |        |        |          |         |          |         |         |         |       |        |        |         |         |          |         |         |
|-------------------------------|-------------------------------------------|---------|--------|--------|---------|----------|---------|---------|---------|--------|--------|----------|---------|----------|---------|---------|---------|-------|--------|--------|---------|---------|----------|---------|---------|
| Ethyl Acetate                 | Aromatic, Brandy, Grape                   | 0.000   | 0.000  | 0.000  | 98.395  | 0.000    | 0.000   | 0.000   | 0.000   | 0.000  | 0.000  | 0.000    | 0.000   | 0.000    | 0.000   | 0.000   | 0.000   | 0.000 | 0.000  | 0.000  | 0.000   | 0.000   | 0.000    | 0.000   |         |
| Ethyl Oleate                  | Dairy products                            | 0.000   | 0.000  | 0.000  | 0.000   | 0.000    | 0.000   | 0.000   | 0.000   | 0.000  | 0.000  | 0.000    | 0.000   | 0.000    | 0.000   | 0.000   | 0.000   | 0.000 | 0.000  | 0.000  | 0.000   | 1.068   | 0.000    | 0.000   | 0.000   |
| Acids                         |                                           |         |        |        |         |          |         |         |         |        |        |          |         |          |         |         |         |       |        |        |         |         |          |         |         |
| Acetic acid                   | acid, fruit, pungent, sour, vinega        | 4.359   | 24.459 | 29.884 | 104.892 | 1847.125 | 242.143 | 516.434 | 142.485 | 26.268 | 0.000  | 1318.287 | 570.058 | 1241.960 | 172.023 | 386.144 | 894.381 | 0.000 | 31.135 | 28.849 | 217.822 | 971.303 | 1699.416 | 472.169 | 715.373 |
| 2-methyl-Propanoic acid       | Burnt, Butter, Cheese, Sweat              | 0.000   | 0.000  | 0.000  | 0.000   | 0.000    | 27.503  | 32.857  | 21.317  | 0.000  | 0.000  | 0.000    | 0.000   | 0.000    | 4.454   | 32.695  | 33.005  | 0.000 | 0.000  | 0.000  | 0.000   | 0.000   | 45.872   | 41.995  | 39.543  |
| 3-methyl-Butanoic acid        | cheese, spicy                             | 0.000   | 0.000  | 0.000  | 0.000   | 18.195   | 73.299  | 93.240  | 47.259  | 0.000  | 0.000  | 0.000    | 0.000   | 7.791    | 11.442  | 65.820  | 68.446  | 0.000 | 0.000  | 0.000  | 0.000   | 9.508   | 135.061  | 110.943 | 114.550 |
| Octanoic acid                 | Cheese, Fat, Grass, Oil                   | 0.772   | 0.000  | 2.195  | 0.000   | 3.149    | 1.288   | 0.000   | 1.301   | 0.000  | 0.000  | 0.000    | 0.000   | 0.000    | 0.000   | 0.000   | 0.000   | 0.000 | 0.000  | 0.000  | 0.000   | 0.000   | 2.577    | 0.000   | 0.000   |
| Terpenoids and Terpenes       |                                           |         |        |        |         |          |         |         |         |        |        |          |         |          |         |         |         |       |        |        |         |         |          |         |         |
| D-Limonene                    | citrus, mint                              | 0.000   | 0.000  | 0.000  | 0.000   | 0.000    | 0.000   | 0.000   | 2.120   | 0.000  | 0.000  | 0.000    | 0.000   | 0.000    | 0.000   | 0.000   | 4.149   | 0.000 | 0.000  | 0.000  | 0.000   | 0.000   | 0.000    | 0.000   | 0.000   |
| trans-Linalool oxide          | flavoring agent                           | 5.670   | 0.000  | 0.000  | 0.000   | 0.000    | 4.983   | 6.069   | 3.569   | 4.144  | 1.875  | 17.325   | 5.272   | 5.723    | 1.027   | 3.313   | 8.209   | 0.000 | 6.752  | 0.000  | 4.105   | 4.540   | 0.000    | 0.000   | 3.317   |
| Linalool                      | coriander, floral, lavender, lemon, rose  | 177.726 | 19.117 | 26.262 | 93.116  | 30.360   | 74.975  | 89.087  | 97.665  | 26.643 | 19.329 | 62.756   | 16.609  | 26.130   | 6.997   | 23.935  | 34.959  | 8.357 | 39.989 | 7.204  | 27.246  | 27.109  | 11.903   | 9.941   | 13.741  |
| Hydrocarbons                  |                                           |         |        |        |         |          |         |         |         |        |        |          |         |          |         |         |         |       |        |        |         |         |          |         |         |
| Toluene                       | caramel, synthetic (off-flavor)           | 0.000   | 0.000  | 0.000  | 0.000   | 0.000    | 0.000   | 1.806   | 1.990   | 4.267  | 0.000  | 0.000    | 0.000   | 0.000    | 0.000   | 0.000   | 3.603   | 0.000 | 0.000  | 0.000  | 0.000   | 0.000   | 2.632    | 0.000   | 0.000   |
| beta.-Myrcene                 | balsamic, fruit, geranium, herb, must     | 0.000   | 5.897  | 0.000  | 0.000   | 0.000    | 21.556  | 4.287   | 17.468  | 0.000  | 3.520  | 0.000    | 0.000   | 0.000    | 0.000   | 6.261   | 0.000   | 0.000 | 9.031  | 0.000  | 12.029  | 0.000   | 0.000    | 2.872   | 0.000   |
| Styrene                       | Sweet balsam, floral plastic (off-flavor) | 0.000   | 0.000  | 0.000  | 0.000   | 7.991    | 0.000   | 4.788   | 5.177   | 5.555  | 0.000  | 9.724    | 0.000   | 0.000    | 0.000   | 0.000   | 8.888   | 0.000 | 0.000  | 0.000  | 0.000   | 0.000   | 9.087    | 0.000   | 0.000   |
| trans-.beta.-Ocimene          | Floral                                    | 0.000   | 6.402  | 0.000  | 0.000   | 0.000    | 28.031  | 8.087   | 22.401  | 0.000  | 3.434  | 0.000    | 0.000   | 0.000    | 0.000   | 8.743   | 0.000   | 0.000 | 6.135  | 0.000  | 0.000   | 0.000   | 0.000    | 0.000   | 0.000   |
| Acetal                        |                                           |         |        |        |         |          |         |         |         |        |        |          |         |          |         |         |         |       |        |        |         |         |          |         |         |
| 2,4,5-trimethyl-1,3-Dioxolane | Indicator of oxidation                    | 0.000   | 0.000  | 4.573  | 0.000   | 0.000    | 3.084   | 2.468   | 1.643   | 0.000  | 0.000  | 0.000    | 126.990 | 0.000    | 0.000   | 2.414   | 4.086   | 0.000 | 0.000  | 0.000  | 0.000   | 0.000   | 2.047    | 2.572   | 1.979   |

Table S4: Concentration of main volatile compounds ( $\mu\text{g/g}$ ) by GC-MS in cocoa beans during fermentation with starter culture

| Compounds                     | Observation                                              | COPALLIN |         |          |         |          |        |        |         |         | TOLOPAMPA |         |         |         |         |         |         |        |         | GUADALUPE |          |         |        |         |         |  |  |  |
|-------------------------------|----------------------------------------------------------|----------|---------|----------|---------|----------|--------|--------|---------|---------|-----------|---------|---------|---------|---------|---------|---------|--------|---------|-----------|----------|---------|--------|---------|---------|--|--|--|
|                               |                                                          | 0h       | 24h     | 48h      | 72h     | 96h      | 120h   | 144h   | 168h    | 0h      | 24h       | 48h     | 72h     | 96h     | 120h    | 144h    | 168h    | 0h     | 24h     | 48h       | 72h      | 96h     | 120h   | 144h    | 168h    |  |  |  |
| Aldehydes                     |                                                          |          |         |          |         |          |        |        |         |         |           |         |         |         |         |         |         |        |         |           |          |         |        |         |         |  |  |  |
| 2-methyl-Butanal              | Almond, Cocoa, Fermented, Hazelnut, Malt                 | 10.030   | 5.419   | 0.000    | 0.000   | 7.987    | 3.892  | 1.059  | 8.169   | 1.762   | 9.317     | 1.038   | 8.789   | 5.817   | 12.067  | 6.316   | 17.562  | 3.334  | 4.996   | 0.000     | 3.904    | 7.300   | 1.626  | 7.579   | 6.395   |  |  |  |
| 3-methyl-Butanal              | Malt, chocolate                                          | 12.852   | 9.971   | 0.000    | 1.352   | 35.483   | 18.743 | 4.924  | 35.658  | 2.706   | 17.361    | 0.000   | 37.599  | 30.253  | 58.668  | 30.774  | 76.318  | 0.000  | 5.707   | 0.949     | 0.000    | 34.197  | 7.096  | 14.262  | 21.720  |  |  |  |
| Hexanal                       | Apple, Fat, Fresh, Green, Oil                            | 5.940    | 21.995  | 0.000    | 0.000   | 0.000    | 0.000  | 0.000  | 0.000   | 0.000   | 6.388     | 0.000   | 0.000   | 0.000   | 0.000   | 0.000   | 0.000   | 0.000  | 4.753   | 0.000     | 0.000    | 0.000   | 0.000  | 0.000   | 0.000   |  |  |  |
| Benzaldehyde                  | Bitter Almond, Burnt Sugar, Cherry, Malt, Roasted Pepper | 0.000    | 0.000   | 0.000    | 0.000   | 8.395    | 0.000  | 0.000  | 0.000   | 0.000   | 0.000     | 0.000   | 11.661  | 0.000   | 0.000   | 0.000   | 0.000   | 0.000  | 0.000   | 0.000     | 34.422   | 0.000   | 0.000  | 0.000   | 20.946  |  |  |  |
| Benzeneacetaldehyde           | Berry, Geranium, Honey, Walnut, Spicy                    | 22.105   | 27.861  | 123.685  | 19.405  | 85.981   | 63.252 | 11.595 | 91.263  | 14.368  | 33.870    | 28.408  | 112.798 | 139.429 | 162.805 | 126.965 | 275.746 | 6.614  | 26.537  | 8.874     | 66.915   | 110.643 | 21.308 | 57.780  | 64.711  |  |  |  |
| Ketones                       |                                                          |          |         |          |         |          |        |        |         |         |           |         |         |         |         |         |         |        |         |           |          |         |        |         |         |  |  |  |
| 2-Pentanone                   | Fruit, spicy                                             | 41.644   | 38.284  | 37.145   | 11.487  | 26.255   | 18.839 | 3.098  | 14.281  | 4.945   | 39.686    | 10.356  | 8.696   | 10.767  | 28.728  | 24.978  | 26.578  | 24.536 | 31.079  | 3.959     | 10.064   | 15.118  | 2.884  | 6.438   | 10.201  |  |  |  |
| 2,3-Butanedione               | Butter, Pastry, Yeast                                    | 0.000    | 0.000   | 0.000    | 0.000   | 0.000    | 0.000  | 0.000  | 10.095  | 0.000   | 0.000     | 0.000   | 3.358   | 0.000   | 10.861  | 0.000   | 9.792   | 0.000  | 0.000   | 0.000     | 0.000    | 0.000   | 0.000  | 0.000   | 4.398   |  |  |  |
| 2-Heptanone                   | Blue Cheese, Fruit, Green, Nut, Spices                   | 42.410   | 84.287  | 49.584   | 24.375  | 68.877   | 49.868 | 16.637 | 119.486 | 137.431 | 51.288    | 38.865  | 52.954  | 43.731  | 131.024 | 99.470  | 86.948  | 16.208 | 208.904 | 42.915    | 91.558   | 106.280 | 30.483 | 69.812  | 115.946 |  |  |  |
| Acetoin                       | Butter, Creamy, Green Pepper                             | 0.000    | 24.487  | 92.123   | 17.098  | 59.090   | 58.653 | 11.356 | 150.257 | 43.609  | 28.416    | 27.158  | 88.587  | 147.227 | 198.513 | 161.465 | 180.952 | 0.000  | 11.187  | 7.950     | 59.012   | 109.139 | 51.751 | 68.748  | 176.843 |  |  |  |
| 2-Nonanone                    | Fragrant, Fruit, Green, Hot Milk                         | 3.614    | 4.383   | 0.000    | 0.000   | 0.000    | 3.902  | 0.000  | 8.855   | 8.955   | 0.000     | 9.527   | 0.000   | 5.137   | 34.476  | 36.245  | 0.000   | 0.000  | 53.485  | 4.723     | 68.403   | 0.000   | 0.000  | 8.289   | 4.387   |  |  |  |
| Acetophenone                  | Almonds, Flower, Meat, Must                              | 6.849    | 7.355   | 20.873   | 0.000   | 0.000    | 4.516  | 0.000  | 9.092   | 3.887   | 10.276    | 0.000   | 14.611  | 10.397  | 9.275   | 0.000   | 13.666  | 5.571  | 16.988  | 0.000     | 0.000    | 16.041  | 0.000  | 6.250   | 14.592  |  |  |  |
| 2-Octanone                    | Fat, Fragrant, Mildew                                    | 0.000    | 0.000   | 0.000    | 0.000   | 0.000    | 0.000  | 0.000  | 0.000   | 1.686   | 0.000     | 0.000   | 0.000   | 0.000   | 0.000   | 0.000   | 0.000   | 0.000  | 0.000   | 0.000     | 0.000    | 0.000   | 0.000  | 0.000   | 0.000   |  |  |  |
| Alcohols                      |                                                          |          |         |          |         |          |        |        |         |         |           |         |         |         |         |         |         |        |         |           |          |         |        |         |         |  |  |  |
| 2-Butanol                     | flavoring agents                                         | 0.000    | 0.000   | 0.000    | 0.000   | 0.000    | 0.000  | 0.000  | 0.000   | 0.000   | 0.000     | 0.000   | 0.000   | 0.000   | 0.000   | 0.000   | 7.375   | 0.000  | 0.000   | 0.000     | 0.000    | 0.000   | 0.000  | 0.000   | 0.000   |  |  |  |
| Ethanol                       | Alcoholic                                                | 0.000    | 826.639 | 3063.627 | 325.958 | 1897.658 | 0.000  | 0.000  | 12.803  | 183.345 | 1848.775  | 128.067 | 335.173 | 400.244 | 27.974  | 220.215 | 0.000   | 21.298 | 926.861 | 231.748   | 2628.314 | 778.737 | 12.306 | 0.000   | 0.000   |  |  |  |
| 2-methyl-3-Buten-2-ol         | Flavoring agents                                         | 16.817   | 8.277   | 29.085   | 3.161   | 13.144   | 4.480  | 0.000  | 0.000   | 5.487   | 11.638    | 3.681   | 5.383   | 6.835   | 8.667   | 12.446  | 13.738  | 7.902  | 6.974   | 0.000     | 9.874    | 9.764   | 0.000  | 0.000   | 2.710   |  |  |  |
| 2-methyl-1-Propanol           | Apple, Bitter, Cocoa, Wine                               | 0.000    | 8.155   | 15.429   | 2.499   | 8.343    | 3.056  | 0.000  | 2.721   | 0.000   | 7.701     | 2.560   | 3.296   | 0.000   | 4.723   | 6.537   | 5.596   | 0.000  | 1.913   | 2.705     | 12.301   | 11.994  | 1.539  | 2.785   | 2.564   |  |  |  |
| 3-methyl-2-Butanol            | Flavoring agents                                         | 0.000    | 0.000   | 0.000    | 33.506  | 0.000    | 0.000  | 7.490  | 30.797  | 0.000   | 0.000     | 0.000   | 0.000   | 0.000   | 0.000   | 0.000   | 0.000   | 0.000  | 0.000   | 0.000     | 0.000    | 0.000   | 0.000  | 47.355  | 0.000   |  |  |  |
| 1-Butanol, 3-methyl-, acetate | Apple, Banana, Glue, Pear                                | 0.000    | 0.000   | 34.491   | 60.470  | 181.737  | 75.114 | 32.195 | 129.672 | 0.000   | 2.951     | 50.359  | 86.046  | 125.856 | 111.891 | 144.989 | 143.230 | 0.000  | 0.000   | 28.524    | 54.783   | 116.450 | 64.751 | 89.977  | 69.209  |  |  |  |
| 2-Pentanol                    | Fusel Oil, Green                                         | 197.424  | 77.156  | 131.697  | 0.000   | 109.764  | 45.815 | 0.000  | 0.000   | 38.661  | 95.195    | 34.243  | 45.565  | 41.550  | 59.678  | 72.648  | 75.010  | 99.138 | 111.810 | 21.088    | 127.175  | 103.998 | 13.875 | 0.000   | 43.249  |  |  |  |
| 3-methyl-1-Butanol            | Burnt, Cocoa, Floral, Malt                               | 0.000    | 56.330  | 137.345  | 48.986  | 170.378  | 50.689 | 11.004 | 65.744  | 12.861  | 66.917    | 29.288  | 44.053  | 43.466  | 41.990  | 55.664  | 45.652  | 0.000  | 47.373  | 52.765    | 199.247  | 224.856 | 23.432 | 79.713  | 73.071  |  |  |  |
| 2-Hexanol                     | Fruity                                                   | 4.742    | 0.000   | 0.000    | 0.000   | 0.000    | 0.000  | 0.000  | 0.000   | 1.921   | 0.000     | 0.000   | 0.000   | 0.000   | 0.000   | 0.000   | 0.000   | 2.279  | 0.000   | 0.000     | 0.000    | 0.000   | 0.000  | 0.000   | 0.000   |  |  |  |
| 2-Heptanol                    | Citrus, Earth, Fried, Mushroom, Oil                      | 102.120  | 168.264 | 116.025  | 54.225  | 158.590  | 74.202 | 30.915 | 161.907 | 198.350 | 56.192    | 68.423  | 78.872  | 62.144  | 152.892 | 137.868 | 95.638  | 34.930 | 359.090 | 95.909    | 622.093  | 280.714 | 40.283 | 144.321 | 168.523 |  |  |  |
| 2-Octanol                     | Fat, Fungus                                              | 0.000    | 0.000   | 0.000    | 0.000   | 0.000    | 0.000  | 0.000  | 0.000   | 0.000   | 0.000     | 0.000   | 0.000   | 0.000   | 0.000   | 0.000   | 0.000   | 0.000  | 0.000   | 0.000     | 10.429   | 0.000   | 0.000  | 0.000   | 0.000   |  |  |  |
| 2-Nonanol                     | Cucumber                                                 | 0.000    | 0.000   | 0.000    | 0.000   | 0.000    | 0.000  | 0.000  | 6.810   | 2.401   | 0.000     | 5.824   | 0.000   | 0.000   | 18.358  | 20.534  | 0.000   | 0.000  | 32.595  | 2.012     | 118.419  | 5.555   | 0.000  | 4.571   | 5.413   |  |  |  |
| 2,3-Butanediol                | Flavoring agents                                         | 0.000    | 5.581   | 119.779  | 0.000   | 170.262  | 79.651 | 12.442 | 102.667 | 0.000   | 19.094    | 0.000   | 48.177  | 44.033  | 91.170  | 158.492 | 229.637 | 0.000  | 16.828  | 4.525     | 112.644  | 53.506  | 25.183 | 27.881  | 149.207 |  |  |  |
| Benzyl alcohol                | Boiled Cherries, Moss, Toast, Rose                       | 0.000    | 0.000   | 0.000    | 0.000   | 0.000    | 0.000  | 0.000  | 0.000   | 0.000   | 10.280    | 0.000   | 0.000   | 0.000   | 0.000   | 0.000   | 0.000   | 0.000  | 13.051  | 0.000     | 59.192   | 0.000   | 0.000  | 0.000   | 0.000   |  |  |  |
| Phenylethyl Alcohol           | Fruit, Honey, Lilac, Rose, Wine                          | 0.000    | 14.473  | 37.458   | 10.532  | 68.747   | 31.133 | 8.931  | 66.396  | 3.472   | 16.890    | 10.004  | 38.239  | 33.105  | 33.913  | 48.924  | 50.939  | 0.000  | 16.921  | 14.326    | 68.932   | 99.636  | 17.472 | 101.286 | 88.759  |  |  |  |
| 1-Pentanol                    | Balsamic, fruit, green, spicy, yeast                     | 0.000    | 4.201   | 0.000    | 0.000   | 0.000    | 0.000  | 0.000  | 0.000   | 0.000   | 0.000     | 0.000   | 0.000   | 0.000   | 0.000   | 0.000   | 0.000   | 0.000  | 0.000   | 0.000     | 0.000    | 0.000   | 0.000  | 0.000   | 0.000   |  |  |  |
| Esters                        |                                                          |          |         |          |         |          |        |        |         |         |           |         |         |         |         |         |         |        |         |           |          |         |        |         |         |  |  |  |

|                                         |                                                           |       |        |         |         |          |         |         |         |        |        |         |         |          |          |          |          |        |        |         |         |          |         |         |          |
|-----------------------------------------|-----------------------------------------------------------|-------|--------|---------|---------|----------|---------|---------|---------|--------|--------|---------|---------|----------|----------|----------|----------|--------|--------|---------|---------|----------|---------|---------|----------|
| Isobutyl acetate                        | Apple, Banana, Floral, Grass                              | 0.000 | 0.000  | 3.621   | 5.367   | 10.678   | 7.442   | 1.591   | 3.791   | 0.000  | 0.000  | 5.921   | 4.361   | 11.715   | 7.046    | 14.342   | 12.852   | 0.000  | 0.000  | 2.083   | 0.000   | 5.118    | 2.409   | 3.488   | 2.152    |
| Acetic acid, butyl ester                | Apple, Banana, Glue, Pungent                              | 0.000 | 0.000  | 3.907   | 0.000   | 6.775    | 1.728   | 0.000   | 0.000   | 0.000  | 0.000  | 0.000   | 0.000   | 0.000    | 0.000    | 0.000    | 0.000    | 0.000  | 0.000  | 0.000   | 0.000   | 4.444    | 0.000   | 0.000   | 4.618    |
| 2-Pentanol, acetate                     | Fruit                                                     | 0.000 | 0.000  | 9.798   | 10.806  | 35.604   | 15.403  | 6.150   | 37.244  | 0.000  | 2.041  | 14.556  | 34.467  | 36.728   | 72.593   | 58.397   | 71.138   | 0.000  | 0.000  | 2.883   | 8.156   | 27.374   | 11.667  | 21.145  | 13.265   |
| Hexanoic acid, ethyl ester              | Apple peel, brandy, bubble gum, overripe fruit, pineapple | 0.000 | 0.000  | 6.065   | 0.000   | 0.000    | 0.000   | 0.000   | 0.000   | 0.000  | 0.000  | 0.000   | 5.216   | 0.000    | 0.000    | 0.000    | 0.000    | 0.000  | 0.000  | 0.000   | 0.000   | 13.426   | 3.372   | 0.000   | 7.057    |
| Propanoic acid, 2-hydroxy-, ethyl ester | cheese, floral, fruity, spicy, rubber                     | 0.000 | 0.000  | 0.000   | 0.000   | 16.003   | 0.000   | 0.000   | 0.000   | 0.000  | 0.000  | 0.000   | 3.145   | 0.000    | 0.000    | 0.000    | 0.000    | 0.000  | 0.000  | 0.000   | 41.371  | 15.542   | 0.000   | 0.000   | 0.000    |
| Acetoin acetate                         | Fruit                                                     | 0.000 | 0.000  | 0.000   | 0.000   | 0.000    | 0.000   | 0.000   | 0.000   | 0.000  | 0.000  | 0.000   | 4.767   | 6.454    | 11.091   | 7.839    | 11.461   | 0.000  | 0.000  | 0.000   | 0.000   | 0.000    | 0.000   | 0.000   | 2.884    |
| 1-Methoxy-2-propyl acetate              | Ester identified in CB                                    | 0.000 | 0.000  | 0.000   | 0.000   | 0.000    | 0.000   | 0.000   | 0.000   | 0.000  | 0.000  | 0.000   | 0.000   | 3.469    | 0.000    | 8.305    | 6.274    | 0.000  | 0.000  | 0.000   | 0.000   | 0.000    | 0.000   | 3.778   | 5.684    |
| Acetic acid, 2-phenylethyl ester        | flower, honey, rose                                       | 0.000 | 0.000  | 0.000   | 3.379   | 7.910    | 3.130   | 3.784   | 0.000   | 0.000  | 0.000  | 4.316   | 10.865  | 14.526   | 6.369    | 18.890   | 12.795   | 0.000  | 0.000  | 0.000   | 0.000   | 0.000    | 4.145   | 0.000   | 0.000    |
| Hexadecanoic acid, ethyl ester          | Wax                                                       | 0.000 | 0.000  | 0.000   | 0.000   | 0.000    | 0.000   | 0.000   | 0.000   | 0.000  | 0.000  | 0.000   | 0.813   | 1.137    | 0.000    | 0.000    | 0.000    | 0.000  | 0.000  | 0.000   | 2.102   | 0.000    | 0.000   | 2.657   | 0.000    |
| 2-Octanol acetate                       | citrus (orange)                                           | 0.000 | 0.000  | 0.000   | 0.000   | 0.000    | 0.000   | 0.000   | 0.000   | 0.000  | 0.000  | 0.000   | 0.000   | 0.000    | 0.000    | 0.000    | 6.299    | 0.000  | 0.000  | 0.000   | 0.000   | 0.000    | 0.000   | 0.000   | 0.000    |
| 1,2-Propanediol, diacetate              | Fruit                                                     | 0.000 | 0.000  | 0.000   | 0.000   | 0.000    | 0.000   | 0.000   | 0.000   | 0.000  | 0.000  | 0.000   | 2.479   | 0.000    | 0.000    | 0.000    | 0.000    | 0.000  | 0.000  | 0.000   | 0.000   | 0.000    | 0.000   | 0.000   | 0.000    |
| Benzeneacetic acid, ethyl ester         | Floral, Fruit, Honey, Rose                                | 0.000 | 0.000  | 0.000   | 0.000   | 6.522    | 0.000   | 0.000   | 0.000   | 0.000  | 0.000  | 0.000   | 4.408   | 5.005    | 0.000    | 4.934    | 0.000    | 0.000  | 0.000  | 0.000   | 0.000   | 0.000    | 0.000   | 0.000   | 0.000    |
| Acids                                   |                                                           |       |        |         |         |          |         |         |         |        |        |         |         |          |          |          |          |        |        |         |         |          |         |         |          |
| Acetic acid                             | Acid, fruit, pungent, sour, vinegar                       | 6.169 | 21.369 | 669.354 | 180.072 | 1538.792 | 700.360 | 158.411 | 590.989 | 0.000  | 52.478 | 301.771 | 774.888 | 1360.353 | 1676.702 | 2723.658 | 2452.167 | 0.000  | 27.621 | 167.668 | 628.150 | 1703.457 | 390.735 | 754.126 | 1394.497 |
| 2-methyl-Propanoic acid                 | Burnt, Butter, Cheese, Sweat                              | 0.000 | 0.000  | 0.000   | 0.000   | 0.000    | 33.665  | 8.237   | 64.297  | 0.000  | 0.000  | 0.000   | 2.659   | 4.017    | 34.232   | 19.179   | 48.367   | 0.000  | 0.000  | 0.000   | 0.000   | 4.426    | 10.704  | 45.395  | 60.782   |
| 3-methyl-Butanoic acid                  | cheese, spicy                                             | 0.000 | 0.000  | 0.000   | 0.000   | 0.000    | 88.288  | 29.373  | 178.271 | 0.000  | 0.000  | 0.000   | 5.632   | 6.221    | 56.946   | 33.756   | 101.646  | 0.000  | 0.000  | 0.000   | 0.000   | 26.032   | 39.265  | 126.963 | 200.954  |
| Octanoic acid                           | Cheese, Fat, Grass, Oil                                   | 0.000 | 0.000  | 0.000   | 1.822   | 0.000    | 1.173   | 0.523   | 2.553   | 0.000  | 0.000  | 0.000   | 0.000   | 0.000    | 0.000    | 0.000    | 0.000    | 0.000  | 0.000  | 0.000   | 4.430   | 0.000    | 0.952   | 2.523   | 0.000    |
| n-Hexadecanoic acid                     | Flavoring agents                                          | 0.000 | 0.000  | 10.067  | 1.199   | 0.000    | 0.000   | 0.525   | 0.000   | 0.000  | 0.000  | 2.407   | 0.000   | 0.000    | 0.000    | 0.000    | 0.000    | 0.925  | 1.991  | 0.700   | 0.000   | 0.000    | 1.322   | 0.000   | 0.000    |
| diethyl-Acetic acid                     | Fruit                                                     | 0.000 | 0.000  | 0.000   | 0.000   | 0.000    | 0.000   | 0.000   | 3.931   | 0.000  | 0.000  | 0.000   | 0.000   | 0.000    | 0.000    | 0.000    | 0.000    | 0.000  | 0.000  | 0.000   | 0.000   | 0.000    | 0.000   | 0.000   | 0.000    |
| Terpenoids and terpenes                 |                                                           |       |        |         |         |          |         |         |         |        |        |         |         |          |          |          |          |        |        |         |         |          |         |         |          |
| D-Limonene                              | citrus, mint                                              | 0.000 | 0.000  | 0.000   | 0.000   | 0.000    | 0.000   | 0.000   | 0.000   | 0.000  | 0.000  | 0.000   | 0.000   | 0.000    | 0.000    | 0.000    | 0.000    | 0.000  | 0.000  | 0.000   | 0.000   | 0.000    | 0.000   | 0.000   | 5.203    |
| trans-Linalool oxide                    | Flavoring agent                                           | 2.962 | 0.000  | 14.470  | 0.000   | 6.429    | 4.980   | 0.000   | 6.699   | 5.334  | 0.000  | 0.000   | 7.501   | 4.548    | 6.364    | 9.328    | 8.356    | 0.000  | 0.000  | 0.000   | 0.000   | 6.662    | 0.000   | 3.960   | 5.984    |
| Linalool                                | Coriander, floral, lavender, lemon, rose                  | 7.195 | 5.695  | 223.784 | 17.014  | 121.159  | 17.492  | 17.191  | 45.398  | 31.203 | 3.853  | 16.111  | 32.651  | 42.636   | 107.878  | 67.750   | 24.608   | 24.146 | 4.636  | 11.520  | 289.716 | 31.739   | 6.631   | 25.461  | 45.018   |
| Furans, furanones, pyrans, pyrones      |                                                           |       |        |         |         |          |         |         |         |        |        |         |         |          |          |          |          |        |        |         |         |          |         |         |          |
| 1-(2-furanyl)-Ethanone                  | Balsamic, Cocoa, Coffee                                   | 0.000 | 0.000  | 0.000   | 0.000   | 0.000    | 0.000   | 0.000   | 0.000   | 0.000  | 0.000  | 0.000   | 0.000   | 0.000    | 3.747    | 0.000    | 0.000    | 0.000  | 0.000  | 0.000   | 0.000   | 0.000    | 0.000   | 0.000   | 0.000    |
| Hydrocarbons                            |                                                           |       |        |         |         |          |         |         |         |        |        |         |         |          |          |          |          |        |        |         |         |          |         |         |          |
| Toluene                                 | Caramel, synthetic (off-flavor)                           | 2.211 | 0.000  | 0.000   | 0.000   | 0.000    | 1.516   | 0.000   | 4.197   | 0.000  | 0.000  | 0.000   | 0.000   | 0.000    | 0.000    | 3.179    | 0.000    | 0.000  | 0.000  | 0.000   | 0.000   | 0.000    | 0.000   | 1.787   | 3.686    |
| beta.-Myrcene                           | Balsamic, fruit, geranium, herb, must                     | 0.000 | 0.000  | 7.092   | 0.000   | 62.976   | 0.000   | 0.000   | 0.000   | 0.000  | 0.000  | 0.000   | 0.000   | 16.223   | 15.009   | 5.034    | 0.000    | 3.968  | 8.730  | 0.000   | 146.569 | 12.246   | 0.000   | 0.000   | 2.454    |
| Styrene                                 | Sweet balsam, floral plastic (off-flavor)                 | 0.000 | 0.000  | 8.046   | 0.000   | 0.000    | 4.845   | 0.000   | 5.551   | 2.175  | 0.000  | 0.000   | 0.000   | 0.000    | 0.000    | 9.501    | 11.766   | 0.000  | 0.000  | 0.000   | 0.000   | 0.000    | 0.000   | 0.000   | 13.339   |
| trans-.beta.-Ocimene                    | Floral                                                    | 0.000 | 0.000  | 0.000   | 0.000   | 84.361   | 0.000   | 0.926   | 0.000   | 0.000  | 0.000  | 0.000   | 0.000   | 23.222   | 13.294   | 0.000    | 0.000    | 4.215  | 4.129  | 0.000   | 194.056 | 0.000    | 0.000   | 11.738  | 0.000    |
| Acetal                                  |                                                           |       |        |         |         |          |         |         |         |        |        |         |         |          |          |          |          |        |        |         |         |          |         |         |          |
| 2,4,5-trimethyl-1,3-Dioxolane           |                                                           | 0.000 | 0.000  | 0.000   | 0.378   | 0.000    | 5.234   | 0.000   | 3.246   | 0.000  | 0.000  | 0.000   | 0.000   | 0.000    | 4.675    | 3.886    | 4.613    | 0.000  | 0.000  | 0.000   | 0.000   | 4.167    | 0.000   | 1.971   | 1.182    |

Dynamics of volatile compounds and flavor precursors during spontaneous fermentation of fine flavor Trinitario cocoa beans

The roasting process and place of cultivation influence the volatile fingerprint of Criollo cocoa from Amazonas, Peru
